# Supplementary material for: Reduction of Mn4+ to Mn2+ in CaAl12O19 by co-doping charge compensators to obtain tunable photoluminescence
Source: Royal Society of Chemistry journal article supplement (doi:10.1039/c3ra22938f), 2013-01-01
Supplement: c3ra22938f.pdf [file c3ra22938f.pdf]

## Supporting Materials

### Reduction of $\text{Mn}^{4+}$ to $\text{Mn}^{2+}$ in $\text{CaAl}_2\text{O}_9$ by co-doping charge compensators to obtain tunable photoluminescence

Jing Lu,<sup>a</sup> Yuexiao Pan<sup>\*a</sup>, Jianguo Wang<sup>a</sup>, Xi'an Chen<sup>a</sup>, Shaoming Huang<sup>a</sup>, Guokui Liu<sup>b\*</sup>

<sup>a</sup>Nanomaterials and Chemistry Key Laboratory, Faculty of Chemistry and Materials

Engineering, Wenzhou University, Zhejiang Province, Wenzhou 325027, P. R. China

<sup>b</sup>Chemical Sciences and Engineering Division, Argonne National Laboratory, Argonne, IL 60439

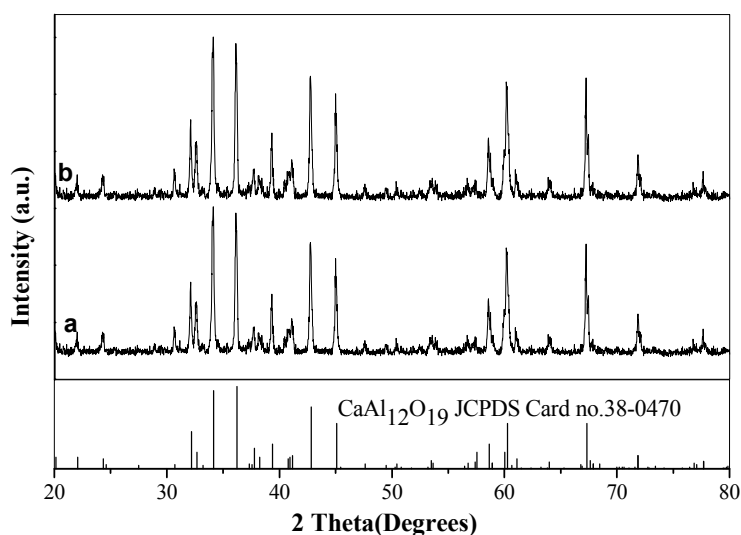

**Figure S1.** XRD patterns of (a)  $\text{CaAl}_2\text{O}_9:0.5\%\text{Mn}$  and (b)  $\text{CaAl}_2\text{O}_9:0.5\%\text{Mn},3\%\text{Bi}^{3+}$  sintered at 1500 °C for 3 h in air. XRD data were collected with an X-ray diffractometer (D8 Advance, Bruker, Germany) with graphite monochromatized Cu  $K\alpha$  radiation ( $\lambda = 0.15406$  nm). Identification of phases was made using standard JCPDS files.

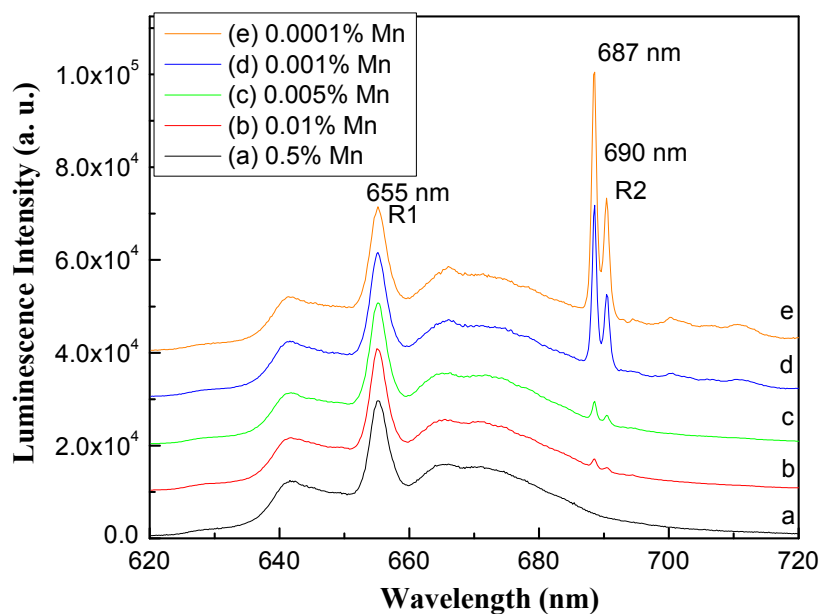

**Figure S2.** Emission spectra of  $\text{CaAl}_{12}\text{O}_{19}:\text{Mn}^{4+}$  with different doping concentration at (a) 0.5, (b) 0.01, (c) 0.005, (d) 0.001, (e) 0.0001 mol% of  $\text{Al}^{3+}$ . The emission spectra were measured on a computer-controlled Triax 320 fluorescence spectrofluorimeter (Jobin-Yvon Inc., Longjumeau, France) with 150 W xenon lamp as the excitation source.

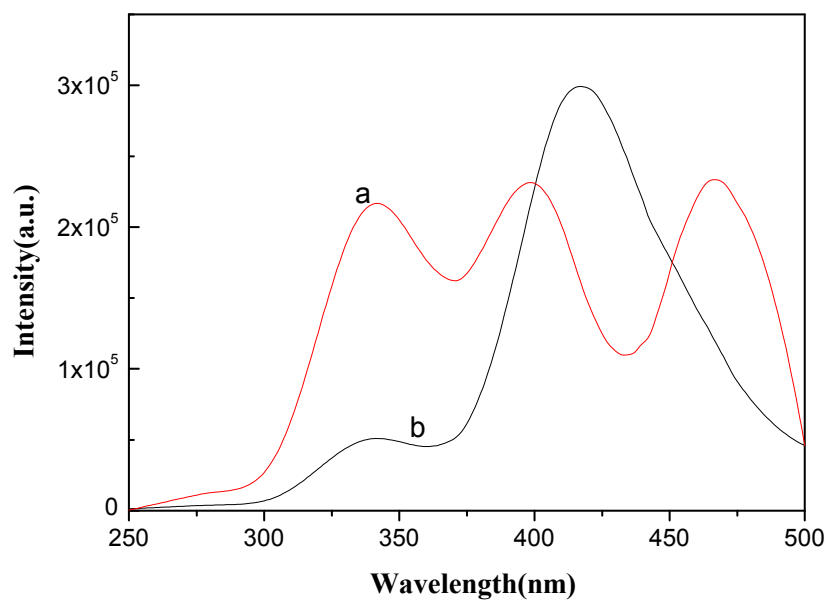

**Figure S3.** Excitation spectra of CAO:0.001%Mn<sup>4+</sup> monitored at (a) 655 nm and (b) 687 nm. The excitation spectra were measured on a computer-controlled Triax 320 fluorescence spectrofluorimeter (Jobin-Yvon Inc., Longjumeau, France).

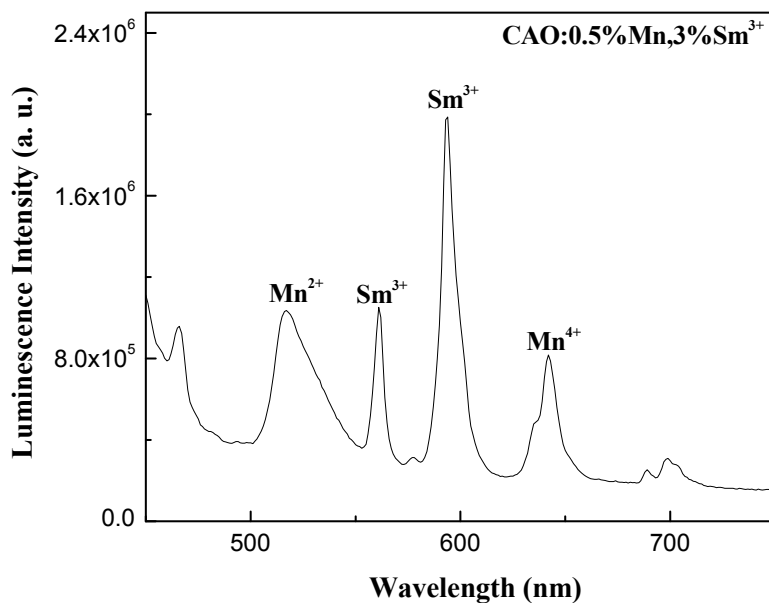

**Figure S4.** Emission spectrum of  $\text{CaAl}_{12}\text{O}_{19}:0.5\%\text{Mn},3\%\text{Sm}^{3+}$  sintered at 1500 °C for 3 h in air. Measurement was performed on fluorescence spectrophotometer (Fluoro Max-4 Horiba Jobin Yvon Holland) at room temperature.

The emission spectrum of  $\text{CaAl}_{12}\text{O}_{19}:0.5\%\text{Mn},3\%\text{Sm}^{3+}$  is composed of emission bands from  $\text{Sm}^{3+}$  at 561 nm and 594 nm,  $\text{Mn}^{2+}$  at 517 nm, and  $\text{Mn}^{4+}$  at 655 nm.

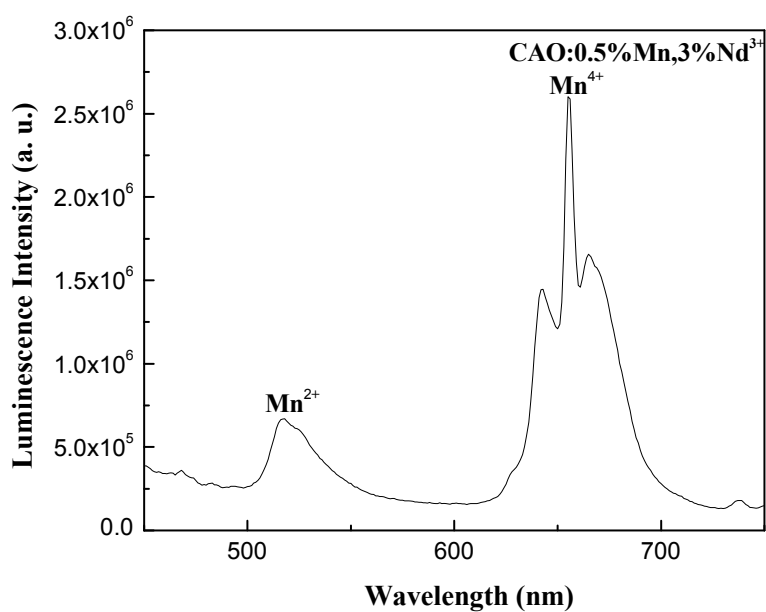

**Figure S5.** Emission spectrum of  $\text{CaAl}_{12}\text{O}_{19}:0.5\%\text{Mn},3\%\text{Nd}^{3+}$  sintered at 1500 °C for 3 h in air. Measurement was performed on fluorescence spectrophotometer (Fluoro Max-4 Horiba Jobin Yvon Holland) at room temperature.

The emission spectrum of  $\text{CaAl}_{12}\text{O}_{19}:0.5\%\text{Mn},3\%\text{Nd}^{3+}$  is composed of green (from  $\text{Mn}^{2+}$ ) at 517 nm and red (from  $\text{Mn}^{4+}$ ) emissions at 655 nm.

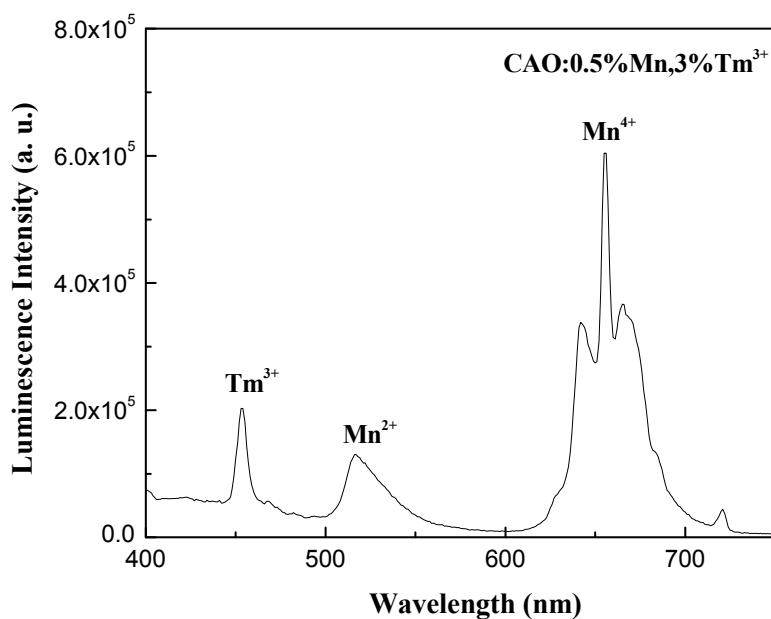

**Figure S6.** Emission spectrum of CaAl<sub>12</sub>O<sub>19</sub>:0.5%Mn,3%Tm<sup>3+</sup> sintered at 1500 °C for 3 h in air. Measurement was performed on fluorescence spectrophotometer (Fluoro Max-4 Horiba Jobin Yvon Holland) at room temperature.

The emission spectrum of CaAl<sub>12</sub>O<sub>19</sub>:0.5%Mn,3%Tm<sup>3+</sup> is composed of blue emission (from Tm<sup>3+</sup>) at 454 nm, green emission (from Mn<sup>2+</sup>) at 517 nm, and red emission (from Mn<sup>4+</sup>) at 655 nm.

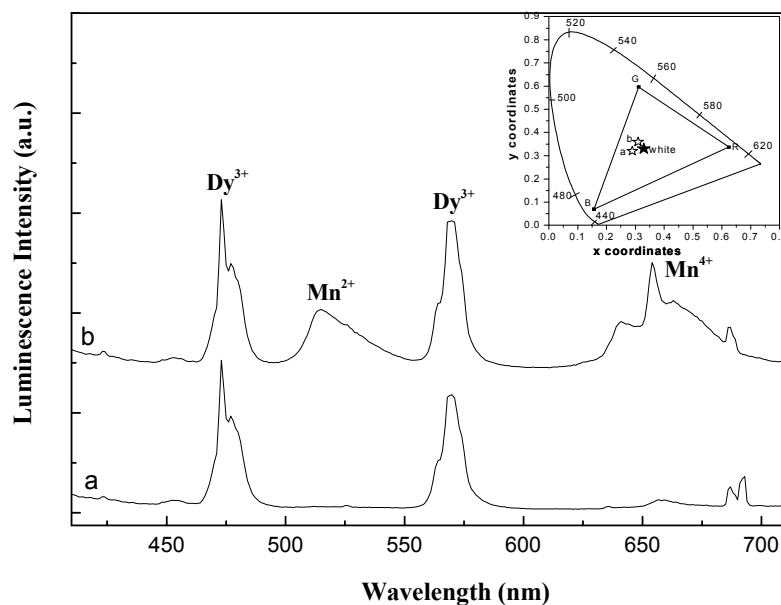

**Figure S7.** Emission spectra ( $\lambda_{\text{ex}}= 395 \text{ nm}$ ) of the phosphor (a)  $\text{CaAl}_{12}\text{O}_{19}:3\%\text{Dy}^{3+}$  and (b)  $\text{CaAl}_{12}\text{O}_{19}:0.5\%\text{Mn}^{4+},3\%\text{Dy}^{3+}$ . Inset: CIE chromaticity diagrams of emission spectra of (a)  $\text{CaAl}_{12}\text{O}_{19}:3\%\text{Dy}^{3+}$  and (b)  $\text{CaAl}_{12}\text{O}_{19}:0.5\%\text{Mn}^{4+},3\%\text{Dy}^{3+}$ .

The emission spectra of  $\text{CAO}:3\% \text{Dy}^{3+}$  shows two characteristic emission bands of  $\text{Dy}^{3+}$ , a blue band of magnetic dipole transition ( ${}^4\text{F}_{9/2} - {}^6\text{H}_{15/2}$ ) and a yellow band of electric dipole transition ( ${}^4\text{F}_{9/2} - {}^6\text{H}_{11/2}$ ) as shown in Fig. 7a. In this phosphor, the electric dipole and magnetic dipole transitions have almost equal intensities because that  $\text{Dy}^{3+}$  at the  $\text{Ca}^{2+}$  site has a high-symmetry in the 12-fold coordinated cuboctahedron lattice structure. Both green emission of  $\text{Mn}^{2+}$  and red emission of  $\text{Mn}^{4+}$  are observed in the PL spectrum of  $\text{CAO}:\text{Mn}$  co-doped with  $3\% \text{Dy}^{3+}$ . The CIE chromaticity coordinates of  $\text{CAO}:3\%\text{Dy}^{3+}$  and  $\text{CAO}:0.5\%\text{Mn}, 3\%\text{Dy}^{3+}$  are depicted by the inset in Fig. 7. While the CIE of both phosphors fill into the white region, but the co-doped phosphor has a stronger red component, therefore, is more attractive for creating warm white light.
